# Supplementary material for: Association of Alzheimer’s disease risk variants on the PICALM gene with PICALM expression, core biomarkers, and feature neurodegeneration
Source: publisher site journal article supplement (doi:10.18632/aging.103814), 2020-11-07
Supplement: Supplementary file [file aging-v12i21-103814-supplementary-material-SD8.pdf]

SUPPLEMENTARY FIGURES

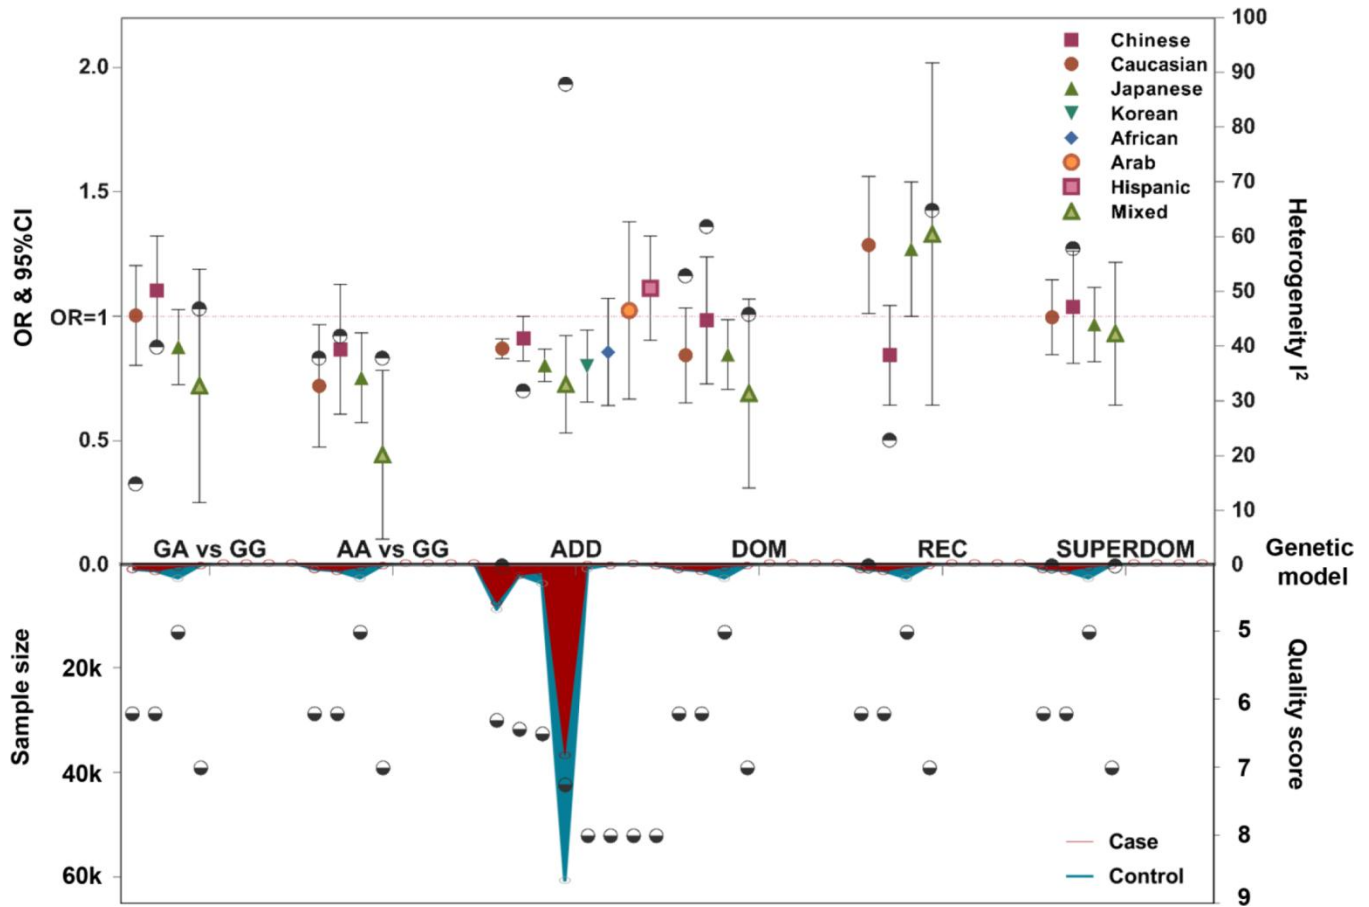

**Supplementary Figure 1. Association of rs3851179 with AD risk with different genetic models in different ethnicities.** rs3851179 (allele A) was associated with lower AD risk, with the effect size ranging from 9% to 29% in Caucasian ( $I^2 = 38\%$ ), Chinese ( $I^2 = 42\%$ ), Japanese, Korean, and population of mixed races ( $I^2 = 38\%$ ), but not in other races. The association remained significant in Caucasian population for other genetic models, such as REC (AA vs GG+GA), and genotype (AA vs GG).

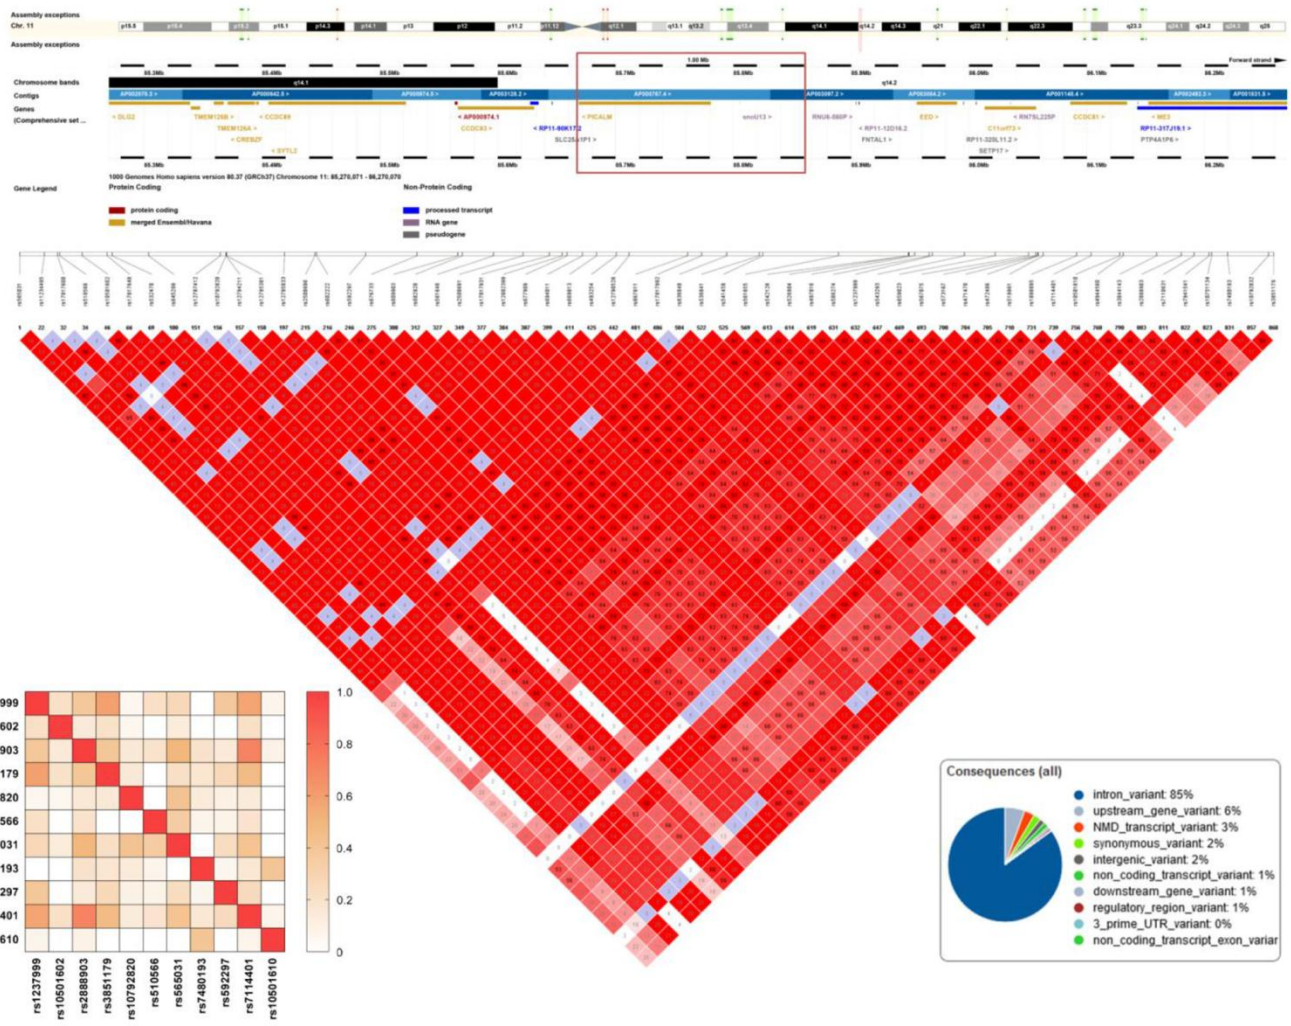

**Supplementary Figure 2. Linkage Disequilibrium Analysis revealed eleven tag SNPs.** Eleven SNPs were selected by LD analysis, such that these 11 loci could independently capture 100% of all alleles at  $r^2 \geq 0.8$ .

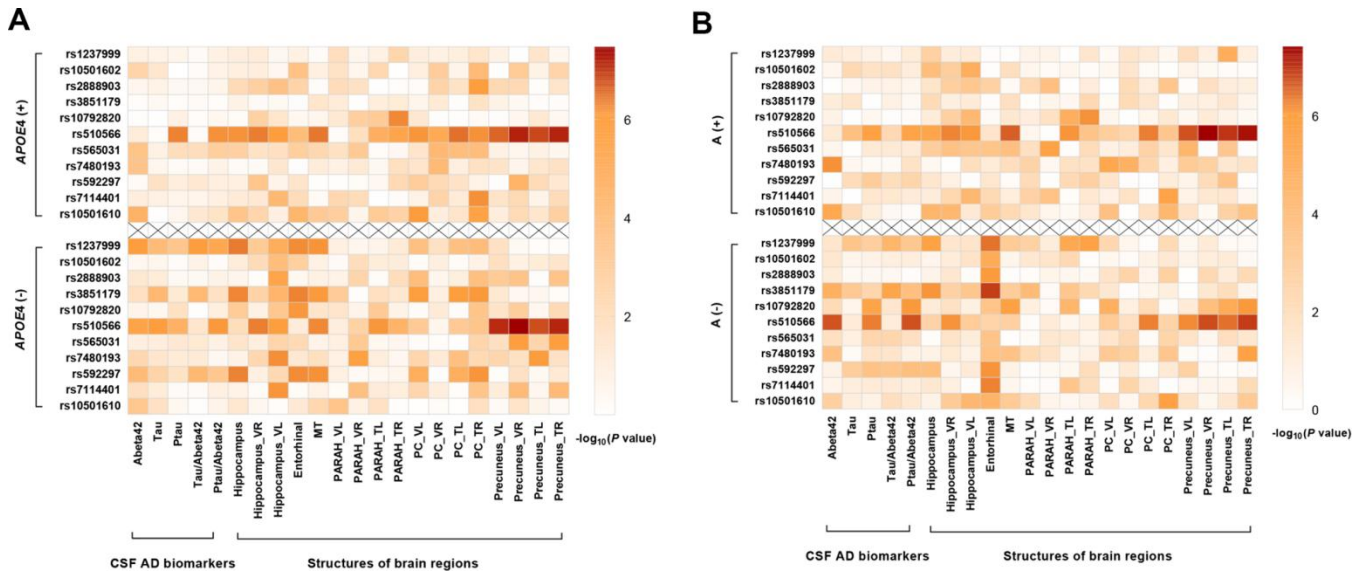

**Supplementary Figure 3. Association results of *PICALM* tag loci with AD CSF biomarkers and feature neurodegeneration, stratified by *APOE4* and amyloid status.** The association for rs510566 was not influenced by subgrouping according to *APOE4*, but remained significant only in A (-) subgroup. The associations with specific loci showed significant trends in *APOE4* (-) subgroup, including rs1237999 ( $p = 0.002$  for HIPPO,  $p = 0.009$  for ENTOR, and  $p = 0.018$  for MT), rs592297 ( $p = 0.003$  for HIPPO,  $p = 0.008$  for ENTOR, and  $p = 0.014$  for MT), and rs3851179 ( $p = 0.005$  for HIPPO,  $p = 0.0037$  for ENTOR,  $p < 0.05$  for MT, and  $p < 0.05$  for PC).
